# Supplementary material for: Deciphering heterogeneity of septic shock patients using immune functional assays: a proof of concept study
Source: PubMed Central journal article supplement (PMC7527338; doi:10.1038/s41598-020-73014-2), 2020-09-30
Supplement: 41598_2020_73014_MOESM1_ESM.pdf [file 41598_2020_73014_MOESM1_ESM.pdf]

## **Deciphering heterogeneity of Septic Shock Patients using Immune Functional Assays: a proof of concept study**

Chloé Albert Vega<sup>1,2,\*</sup>, Guy Oriol<sup>1,2</sup>, François Bartolo<sup>1,3</sup>, Jonathan Lopez<sup>4</sup>, Alexandre Pachot<sup>2</sup>, Thomas Rimmelé<sup>5,6</sup>, Fabienne Venet<sup>5,7</sup>, Véronique Leray<sup>6</sup>, Guillaume Monneret<sup>5,7</sup>, Benjamin Delwarde<sup>6</sup>, Karen Brengel-Pesce<sup>1,2</sup>, Julien Textoris<sup>2,5,6</sup>, François Mallet<sup>1,2,5,#</sup>, Sophie Trouillet-Assant<sup>1, 8, #</sup>

<sup>1</sup>Joint Research Unit Hospices Civils de Lyon-bioMérieux, Hospices Civils de Lyon, Centre Hospitalier Lyon Sud, Pierre-Bénite, 69495 Lyon, France.

<sup>2</sup>Open Innovation and Partnerships Department, bioMérieux S.A., France.

<sup>3</sup>Soladis, Lyon, France

<sup>4</sup>Hospices Civils de Lyon - Plateforme de Recherche de Transfert en Oncologie, Centre Hospitalier Lyon Sud, Pierre-Bénite, 69495 Lyon, France.

<sup>5</sup>EA 7426 Pathophysiology of Injury-Induced Immunosuppression, PI3, Claude Bernard Lyon 1 University-bioMérieux-Hospices Civils de Lyon, Hôpital Edouard Herriot, 69437 Lyon, France.

<sup>6</sup>Hospices Civils de Lyon, Hôpital Edouard Herriot, Anesthesia and Critical Care Medicine Department, 69437 Lyon, France.

<sup>7</sup>Hospices Civils de Lyon, Hôpital Edouard Herriot, Immunology Laboratory, 69437 Lyon, France.

<sup>8</sup>Virpath - Université Lyon, CIRI, INSERM U1111, CNRS 5308, ENS, UCBL, Faculté de Médecine Lyon Est, 7 rue Guillaume Paradin, 69372 LYON cedex 08, France.

<sup>#</sup>Equally contributed to this work

\*Corresponding author

## SUPPLEMENTARY INFORMATION

### SUPPLEMENTARY FIGURES

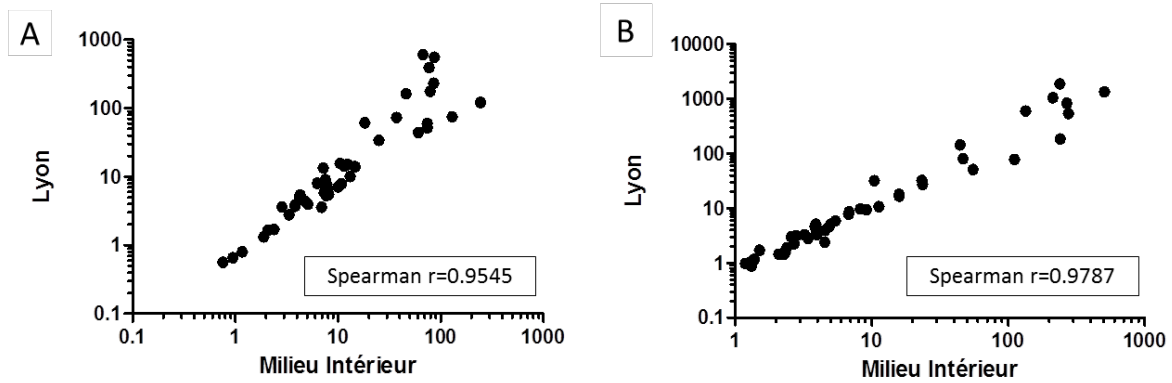

**Figure S1. Comparison of response to stimulation between independent studies.**

Responses to (A) LPS and (B) SEB stimulations post-24 hours was evaluated in 10 healthy volunteers representing the control population of the present study referred to as the Lyon study, and in 25 healthy volunteers from the *Milieu Intérieur* study (Urrutia et al. 2016). Comparison of the response to each stimulation between both cohorts was performed on medians of gene expression ratios (stimulation condition / NUL condition) from the 44-gene signature representative of a healthy immunity (Urrutia et al. 2016). Gene expression was quantified using Nanostring nCounter technology and normalised by nSolver software using four housekeeping genes (HPRT1, POLR2A, RPL19 and TBP). The *Milieu Intérieur* data was obtained from Gene Expression Omnibus (GEO) DataSets (GSE85176). A Spearman's correlation coefficient was calculated for each condition and indicated on each graphical representation. LPS: lipopolysaccharide, SEB: staphylococcal enterotoxin B.

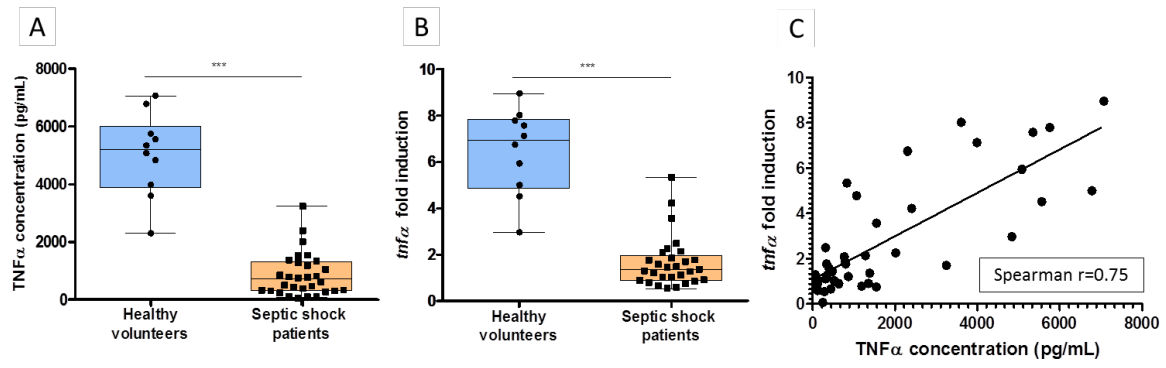

**Figure S2. TNF $\alpha$  secreted protein and gene expression between healthy volunteers (HV) and septic shock patients.** TNF $\alpha$  response measured in (A) protein secretion and (B) gene expression to LPS stimulation in 10 HV (blue) and 30 septic shock patients (orange). (C) Spearman's correlation coefficient between protein and gene expression for TNF $\alpha$ . \*\*\*p<0.001. LPS: lipopolysaccharide.

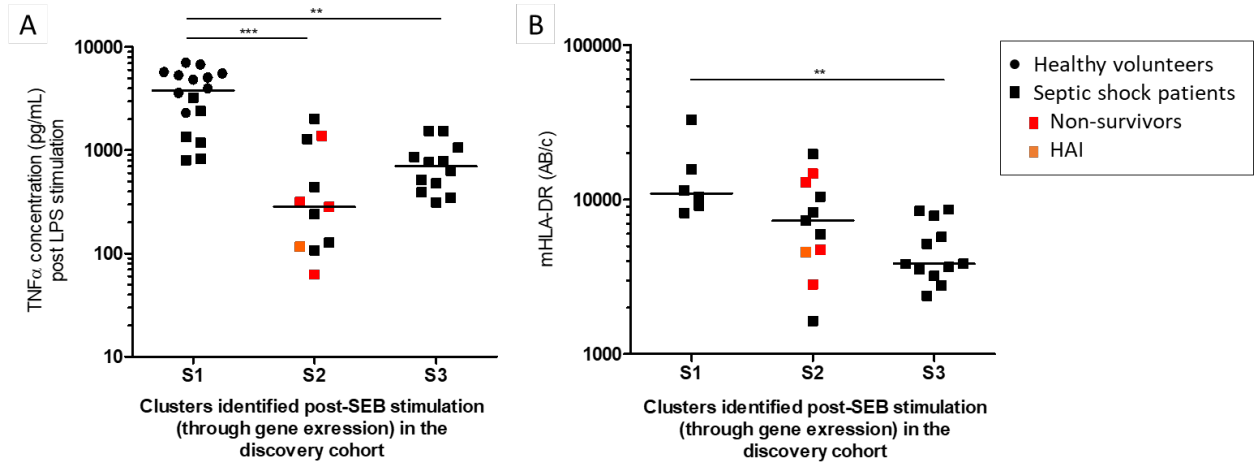

**Figure S3. TNF $\alpha$  protein secretion post-LPS stimulation and mHLA-DR distribution in clusters identified upon SEB stimulation (through gene expression) in the discovery cohort.** At day 3-4 after septic shock onset, **(A)** TNF $\alpha$  protein secretion was measured *ex vivo* 24 hours post-LPS stimulation in HV (circles) and septic shock patients (squares) and **(B)** mHLA-DR was measured with flow cytometry only in septic shock patients (squares). Mortality is depicted in red and HAI in orange. Clusters post-SEB stimulation were obtained using PAM method with correlation distance. \*\* $p < 0.001$ ; \*\*\* $p < 0.0001$ . SEB: staphylococcal enterotoxin B, LPS: lipopolysaccharide, mHLA-DR: monocyte human leukocyte antigen DR, HV: healthy volunteers and HAI: hospital-acquired infection.

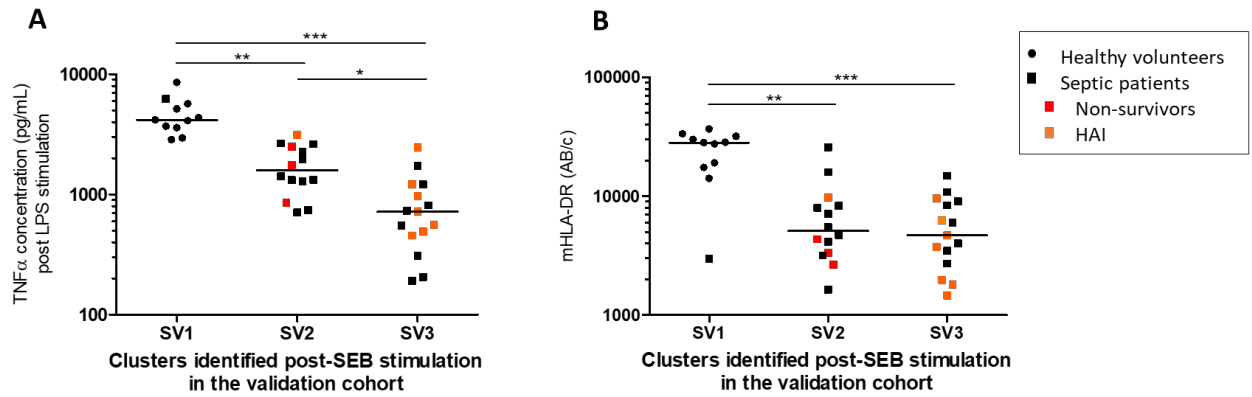

**Figure S4. TNF $\alpha$  protein secretion post-LPS stimulation and mHLA-DR distribution in clusters identified upon SEB stimulation (through gene expression) in the validation cohort.** At day 3-4 after admission to the study, (A) TNF $\alpha$  protein secretion was measured *ex vivo* 24 hours post-LPS stimulation and (B) mHLA-DR was measured with flow cytometry in HV (circles) and septic patients (squares). Mortality is depicted in red and HAI in orange. Cluster post-SEB stimulation was obtained using PAM method with correlation distance. \*\* $p < 0.001$ ; \*\*\* $p < 0.0001$ . SEB: staphylococcal enterotoxin B, LPS: lipopolysaccharide, mHLA-DR: monocyte human leukocyte antigen DR, HV: healthy volunteers, SP: septic patients and HAI: hospital-acquired infection.

## **SUPPLEMENTARY METHODS**

### **Experimental pipeline**

The pipeline to complete the analysis from blood collection to clustering required 60 hours. In details, 24 hours of blood stimulation, 6 hours for RNA preparation and 27 hours for RNA detection using NanoString protocol and 3 hours of analysis and clustering.

### **Biological measurements**

#### Molecular detection

For TruCulture cell pellet handling and RNA processing and detection, the protocol was carried out according to the study by Urrutia et al. Cell pellets from TruCulture stimulations kept in TRI Reagent LS (Sigma-Aldrich) were thawed under agitation. Before processing, thawed samples were centrifuged (3.000 g for 5 minutes at 4°C) to pellet cellular debris generated during the Trizol lysis. For extraction, a modified protocol of the NucleoSpin 96 RNA tissue kit (Macherey-Nagel GmbH&Co. KG, Düren, Germany) was followed using a vacuum system. Briefly, 600 µL of clarified Trizol lysate was transferred to a tube preloaded with 900 µL 100% ethanol. The binding mixture was transferred to a silica column, then washed with buffers MW1 and MW2, and RNA was eluted using 30 µL RNase-free water. NanoString technology was used for mRNA detection of an 86-gene panel (Supplementary Table 1), a hybridisation-based multiplex assay characterised by its amplification-free step; 300 ng of RNA were hybridised to the probes at 67°C for 18 hours using a thermocycler (Biometra, Tprofessional TRIO, Analytik Jena AG, Jena, Germany). After removal of excessive probes, samples were loaded into the nCounter Prep Station (NanoString Technologies, Seattle, WA, USA) for purification and immobilisation onto the internal surface of a sample cartridge for 2-3 hours. The sample cartridge was then transferred and imaged on the nCounter Digital Analyzer (NanoString Technologies) where colour codes were counted and tabulated for the 86 genes.

## **Gene expression analysis**

### Generation of normalised data

Each sample was analysed in a separate multiplexed reaction each including 8 negative probes and 6 serial concentrations of positive control probes. Negative control analysis was performed to determine the background for each sample. Data was imported into nSolver analysis software (version 4.0, NanoString technologies) for quality checking and normalisation of the data. A first step of normalisation using the internal positive controls allowed correction of a potential source of variation associated with the technical platform. To do so, we calculated for all the samples the background level as the median +3 SD across the six negative probe counts. Every sample under the background level was fixed to this value. Next, we calculated for each sample the geometric mean of the positive probe counts. A scaling factor for a sample was a ratio of the geometric mean of the sample and the average across all geometric means. For each sample, we divided all gene counts by the corresponding scaling factor. To normalise for differences in RNA input we used the same method as in the positive control normalisation, except that geometric means were calculated over three housekeeping genes (HPRT1 (NM\_000194.1), DECR1 (NM\_001359.1), and TBP (NM\_001172085.1)). These genes were selected using NormFinder method, an established approach for identification of stable housekeeping genes within and between groups, from the 6 candidate genes included in the custom panel. Results are expressed as fold change inductions.

### Cluster building

Data were log<sub>10</sub>-transformed, centred and scaled. Two distances matrix and a correlation matrix were built on the data and 10 clustering methods were launched ("hierarchical", "k-means", "diana", "fanny", "som", "model", "sota", "pam", "clara", and "agnes"). For each method, k=3 to k=18 clusters were tested. The best clusters methods were selected using 7

indexes combining internal (connectivity, silhouette width, and Dunn index) and stability measures (the average proportion of non-overlap (APN), the average distance (AD), the average distance between means (ADM), and the figure of merit (FOM)). The most stable method for LPS was the hierarchical method using manhattan distances and single-linkage clustering (score index=17), however this method for SEB response had a score index of 541, so the most stable method for SEB was found to be the PAM method using correlation and average distance (score index=31).



## SUPPLEMENTARY TABLES

**Supplementary Table S1. Presence and nature of patients' comorbidities in the discovery cohort.**

| Sample | Comorbidities | Cerebro-vascular damage | Pulmonary chronic | Heart failure | Myocardial infarction | Ulcer | Diabetes | Renal damage | Solid tumours malignancy |
|--------|---------------|-------------------------|-------------------|---------------|-----------------------|-------|----------|--------------|--------------------------|
| D1     | 1             | 0                       | 1                 | 0             | 0                     | 1     | 1        | 0            | 0                        |
| D2     | 1             | 0                       | 0                 | 1             | 0                     | 0     | 0        | 1            | 0                        |
| D3     | 1             | 0                       | 0                 | 0             | 0                     | 0     | 0        | 2            | 0                        |
| D4     | 1             | 0                       | 0                 | 0             | 0                     | 1     | 0        | 0            | 0                        |
| D5     | 1             | 1                       | 0                 | 1             | 0                     | 0     | 0        | 3            | 0                        |
| D6     | 0             | 0                       | 0                 | 0             | 0                     | 0     | 0        | 0            | 0                        |
| D8     | 0             | 0                       | 0                 | 0             | 0                     | 0     | 0        | 0            | 0                        |
| D9     | 1             | 0                       | 0                 | 1             | 1                     | 0     | 1        | 3            | 0                        |
| D10    | 1             | 1                       | 0                 | 0             | 0                     | 0     | 0        | 0            | 1                        |
| D11    | 1             | 0                       | 0                 | 0             | 0                     | 0     | 1        | 0            | 0                        |
| D12    | 1             | 1                       | 0                 | 0             | 0                     | 0     | 0        | 0            | 1                        |
| D13    | 1             | 0                       | 1                 | 0             | 0                     | 0     | 0        | 0            | 1                        |
| D14    | 1             | 0                       | 0                 | 0             | 0                     | 1     | 0        | 0            | 2                        |
| D25    | 1             | 1                       | 0                 | 1             | 1                     | 0     | 2        | 1            | 1                        |
| D26    | 0             | 0                       | 0                 | 0             | 0                     | 0     | 0        | 0            | 0                        |
| D27    | 1             | 0                       | 0                 | 0             | 0                     | 0     | 0        | 0            | 1                        |
| D28    | 1             | 0                       | 1                 | 0             | 1                     | 0     | 1        | 0            | 1                        |
| D29    | 1             | 0                       | 1                 | 0             | 0                     | 0     | 0        | 0            | 0                        |
| D30    | 1             | 0                       | 1                 | 0             | 0                     | 0     | 0        | 0            | 0                        |
| D31    | 0             | 0                       | 0                 | 0             | 0                     | 0     | 0        | 0            | 0                        |
| D32    | 1             | 0                       | 0                 | 0             | 0                     | 0     | 0        | 1            | 0                        |
| D33    | 1             | 0                       | 0                 | 0             | 1                     | 0     | 0        | 0            | 1                        |
| D34    | 1             | 0                       | 0                 | 0             | 0                     | 0     | 1        | 0            | 0                        |
| D35    | 1             | 0                       | 0                 | 0             | 0                     | 0     | 1        | 1            | 2                        |
| D36    | 0             | 0                       | 0                 | 0             | 0                     | 0     | 0        | 0            | 0                        |
| D37    | 0             | 0                       | 0                 | 0             | 0                     | 0     | 0        | 0            | 0                        |
| D38    | 0             | 0                       | 0                 | 0             | 0                     | 0     | 0        | 0            | 0                        |
| D39    | 0             | 0                       | 0                 | 0             | 0                     | 0     | 0        | 0            | 0                        |
| D40    | 0             | 0                       | 0                 | 0             | 0                     | 0     | 0        | 0            | 0                        |
| D41    | 0             | 0                       | 0                 | 0             | 0                     | 0     | 0        | 0            | 0                        |

**Supplementary Table S2. Infection number, type, and germ responsible for sepsis in the discovery cohort.**

| Sample | Infection number | Type                            | Germ                                                              |
|--------|------------------|---------------------------------|-------------------------------------------------------------------|
| D1     | 1                | Gram-negative                   | <i>Escherichia coli</i>                                           |
| D2     | 1                | Gram-negative                   | <i>Escherichia coli</i>                                           |
| D3     | 2                | Gram-positive                   | <i>Enterococcus faecium</i> and <i>Streptococcus spp</i>          |
| D4     | NA               |                                 | Non-documented infection                                          |
| D5     | 1                | Gram-negative                   | <i>Proteus mirabilis</i>                                          |
| D6     | 2                | Gram-negative and Gram-positive | <i>Ungroupable Streptococcus</i> and <i>Klebsiella pneumoniae</i> |
| D8     | NA               |                                 | Non-documented infection                                          |
| D9     | NA               |                                 | Non-documented infection                                          |
| D10    | 1                | Gram-positive                   | <i>Enterococcus faecium</i>                                       |
| D11    | NA               |                                 | Non-documented infection                                          |
| D12    | 2                | Gram-negative and Gram-positive | <i>Escherichia coli</i> and <i>Enterococcus spp</i>               |
| D13    | NA               |                                 | Non-documented infection                                          |
| D14    | 2                | Gram-positive and fungal        | <i>Enterococcus faecium</i> and <i>Candida tropicalis</i>         |
| D25    | NA               |                                 | Non-documented infection                                          |
| D26    | 1                | Gram-positive                   | <i>Streptococcus pyogenes (A)</i>                                 |
| D27    | NA               |                                 | Non-documented infection                                          |
| D28    | 1                | Gram-negative                   | <i>Enterobacter cloacae</i>                                       |
| D29    | 2                | Gram-positive                   | <i>Lactobacillus spp</i> and <i>Enterococcus faecalis</i>         |
| D30    | 1                | Virus                           | <i>Influenza</i>                                                  |
| D31    | 2                | Gram-positive and fungal        | <i>Staphylococcus epidermidis</i> and <i>Candida albicans</i>     |
| D32    | 2                | Gram-negative and Gram-positive | <i>Klebsiella oxytoxa</i> and <i>Enterococcus faecalis</i>        |
| D33    | 1                | Gram-negative                   | <i>Escherichia coli</i>                                           |
| D34    | 1                | Gram-negative                   | <i>Escherichia coli</i>                                           |
| D35    | 2                | Gram-negative and Gram-positive | <i>Escherichia coli</i> and <i>Enterococcus spp</i>               |
| D36    | NA               |                                 | Non-documented infection                                          |
| D37    | 2                | Gram-positive                   | <i>Enterococcus faecalis</i> and <i>Enterococcus spp</i>          |
| D38    | 1                | Gram-negative                   | <i>Escherichia coli</i>                                           |
| D39    | NA               |                                 | Non-documented infection                                          |
| D40    | NA               |                                 | Non-documented infection                                          |
| D41    | 2                | Gram-positive                   | <i>Ungroupable (viridans) Streptococcus</i>                       |

**Supplementary Table S3. Weight of genes driving the total variance in first (PC1) and second (PC2) component for LPS stimulation in both populations. Ordered from the highest to the lowest in absolute value.**

| <b>LPS stimulation_PC1</b> | <b>weight</b> | <b>LPS stimulation_PC2</b> | <b>weight</b> |
|----------------------------|---------------|----------------------------|---------------|
| SLAMF7                     | -0.1554       | CD74                       | 0.3081        |
| NFKBIA                     | -0.1551       | HLA-DPA1                   | 0.3030        |
| NFKB1                      | -0.1505       | HLA-DRA                    | 0.2859        |
| IDO1                       | -0.1501       | HLA-DMB                    | 0.2740        |
| IFIH1                      | -0.1496       | HLA-DPB1                   | 0.2623        |
| NFKB2                      | -0.1495       | BST2                       | 0.1889        |
| NFKBIZ                     | -0.1494       | IL18                       | 0.1741        |
| OAS1                       | -0.1470       | ZBP1                       | 0.1714        |
| 121601901-HERV0116         | -0.1467       | RPLP0                      | 0.1639        |
| RELB                       | -0.1460       | RARRES3                    | 0.1563        |
| CXCL2                      | -0.1455       | TBX21                      | 0.1507        |
| IFI44L                     | -0.1455       | STAT2                      | 0.1432        |
| SOCS3                      | -0.1451       | IRF3                       | 0.1328        |
| IL1A                       | -0.1431       | ARL14EP                    | 0.1313        |
| IRF7                       | -0.1424       | IL6                        | -0.1305       |
| CXCL10/IP10                | -0.1422       | OAS2                       | 0.1292        |
| SRC                        | -0.1415       | RPL19                      | 0.1290        |
| ADGRE3                     | 0.1413        | IFI35                      | 0.1283        |
| TNFA                       | -0.1411       | MX1                        | 0.1252        |
| IFI35                      | -0.1400       | ZAP70                      | 0.1240        |
| CDKN1A                     | -0.1395       | DYRK2                      | 0.1236        |
| CCL4                       | -0.1387       | IL18R1                     | -0.1213       |
| IRAK2                      | -0.1384       | MDC1                       | 0.1191        |
| TNFSF10                    | -0.1378       | TNFSF13B                   | 0.1186        |
| IFNG                       | -0.1369       | IL1B                       | -0.1099       |
| STAT2                      | -0.1351       | PTGS2                      | -0.1068       |
| DDX58/RIG1                 | -0.1347       | TNFSF10                    | 0.1053        |
| IL1B                       | -0.1337       | OAS1                       | 0.1050        |
| HAVCR2/TIM3                | -0.1325       | S100A9                     | -0.1038       |
| SOCS1                      | -0.1319       | IL1R2                      | -0.1020       |
| CCL8                       | -0.1317       | DDX58/RIG1                 | 0.0930        |
| CD83                       | -0.1317       | IL10                       | -0.0909       |
| CCR1                       | -0.1316       | JAK2                       | 0.0860        |
| TNFSF13B                   | -0.1308       | CD3D                       | 0.0858        |
| OAS2                       | -0.1296       | CCL20                      | -0.0849       |
| PTGS2                      | -0.1254       | IL1A                       | -0.0812       |
| CD44                       | -0.1194       | 121601901-HERV0116         | 0.0782        |
| C3                         | -0.1193       | MERTK                      | 0.0780        |
| RPL19                      | 0.1171        | IFIH1                      | 0.0747        |
| CXCL9                      | -0.1170       | SOCS3                      | -0.0717       |

|                |         |                |         |
|----------------|---------|----------------|---------|
| IL6            | -0.1162 | IRF7           | 0.0707  |
| IFI27          | -0.1125 | CLEC7A/DECTIN1 | 0.0695  |
| BST2           | -0.1121 | CDKN1A         | -0.0669 |
| JAK2           | -0.1094 | NFKBIZ         | -0.0657 |
| IL10           | -0.1081 | EIF2AK4        | 0.0634  |
| CCL2           | -0.1078 | IFI44L         | 0.0622  |
| CX3CR1         | 0.1054  | PTX3           | -0.0558 |
| MX1            | -0.1052 | TDRD9          | -0.0534 |
| TNFAIP3        | -0.1046 | IDO1           | -0.0520 |
| CCL20          | -0.1040 | TNFAIP3        | -0.0518 |
| EIF2AK4        | 0.0920  | HAVCR2/TIM3    | 0.0514  |
| IFITM1         | -0.0918 | CXCL9          | 0.0502  |
| CLEC7A/DECTIN1 | 0.0867  | NFKBIA         | -0.0490 |
| ZBP1           | -0.0850 | CXCL2          | -0.0462 |
| RPLP0          | 0.0840  | CCL8           | 0.0427  |
| HLA-DPB1       | 0.0775  | CD209/DC-SIGN  | 0.0425  |
| DYRK2          | 0.0770  | TGFB1          | 0.0406  |
| LILRB1         | -0.0753 | IL7R           | 0.0397  |
| RARRES3        | -0.0707 | C3             | 0.0388  |
| TBX21          | 0.0689  | LILRB1         | 0.0387  |
| POLR2A         | -0.0674 | NFKB2          | -0.0384 |
| PTX3           | -0.0660 | NFKB1          | -0.0382 |
| POU2F2         | -0.0643 | ADGRE3         | 0.0355  |
| ARL14EP        | 0.0630  | POLR2A         | -0.0344 |
| IL7R           | 0.0614  | ZBTB16         | 0.0339  |
| IL18           | -0.0605 | CD44           | -0.0334 |
| CD3D           | 0.0521  | CXCL10/IP10    | 0.0326  |
| S100A9         | -0.0469 | POU2F2         | 0.0310  |
| TMEM173/STING  | -0.0452 | CCL2           | 0.0307  |
| IL18R1         | 0.0430  | SOCS1          | 0.0229  |
| HLA-DRA        | -0.0420 | CX3CR1         | 0.0225  |
| HLA-DMB        | 0.0412  | IFNG           | 0.0220  |
| ZAP70          | 0.0384  | RELB           | -0.0210 |
| TGFB1          | -0.0382 | IRAK2          | -0.0185 |
| TDRD9          | 0.0328  | TMEM173/STING  | -0.0156 |
| IRF3           | 0.0317  | SLAMF7         | -0.0151 |
| MDC1           | 0.0301  | IFI27          | 0.0150  |
| HLA-DPA1       | 0.0300  | CCR1           | 0.0121  |
| IL1R2          | 0.0226  | IFITM1         | -0.0118 |
| CCNB1IP1       | 0.0200  | FAM89A         | -0.0091 |
| ZBTB16         | 0.0143  | TNFA           | 0.0080  |
| IL2            | 0.0096  | IL2            | 0.0039  |
| MERTK          | -0.0089 | CCNB1IP1       | -0.0036 |
| FAM89A         | -0.0071 | CCL4           | -0.0032 |
| CD209/DC-SIGN  | -0.0035 | CD83           | -0.0013 |
| CD74           | -0.0023 | SRC            | 0.0002  |

**Supplementary Table S4. Weight of genes driving the total variance in first (PC1) and second (PC2) component for SEB stimulation in both populations. Ordered from the highest to the lowest in absolute value.**

| <b>SEB stimulation_PC1</b> | <b>weight</b> | <b>SEB stimulation_PC2</b> | <b>weight</b> |
|----------------------------|---------------|----------------------------|---------------|
| RARRES3                    | -0.1761       | 121601901-HERV0116         | 0.2284        |
| IL1A                       | 0.1721        | SLAMF7                     | 0.2111        |
| CXCL2                      | 0.1675        | CCL4                       | 0.2038        |
| STAT2                      | -0.1658       | C3                         | 0.1919        |
| IFNG                       | 0.1633        | CXCL10/IP10                | 0.1880        |
| PTGS2                      | 0.1616        | IFIH1                      | 0.1831        |
| CCL20                      | 0.1576        | IDO1                       | 0.1793        |
| NFKB1                      | 0.1572        | CXCL9                      | 0.1783        |
| ZBP1                       | -0.1552       | IFI44L                     | 0.1778        |
| NFKBIA                     | 0.1535        | TNFAIP3                    | 0.1770        |
| HLA-DMB                    | -0.1522       | CD44                       | 0.1735        |
| CD209/DC-SIGN              | 0.1507        | POU2F2                     | 0.1683        |
| IL1B                       | 0.1498        | OAS2                       | 0.1658        |
| NFKB2                      | 0.1485        | IRAK2                      | 0.1607        |
| NFKBIZ                     | 0.1478        | CD74                       | 0.1591        |
| BST2                       | -0.1477       | HLA-DRA                    | 0.1538        |
| TNFSF10                    | -0.1466       | ADGRE3                     | -0.1522       |
| DDX58/RIG1                 | -0.1463       | OAS1                       | 0.1480        |
| CX3CR1                     | -0.1458       | TNFA                       | 0.1440        |
| HLA-DPB1                   | -0.1434       | SRC                        | 0.1431        |
| CDKN1A                     | 0.1426        | HLA-DPA1                   | 0.1429        |
| IL6                        | 0.1423        | TNFSF13B                   | 0.1336        |
| IFI35                      | -0.1403       | SOCS1                      | 0.1317        |
| CD83                       | 0.1394        | IFI35                      | 0.1304        |
| HAVCR2/TIM3                | 0.1356        | MX1                        | 0.1288        |
| HLA-DPA1                   | -0.1313       | HLA-DPB1                   | 0.1202        |
| TNFA                       | 0.1312        | CD83                       | 0.1198        |
| HLA-DRA                    | -0.1312       | TMEM173/STING              | 0.1188        |
| IL2                        | 0.1302        | HLA-DMB                    | 0.1171        |
| IRAK2                      | 0.1294        | MDC1                       | 0.1148        |
| RELB                       | 0.1283        | CDKN1A                     | 0.1086        |
| CD74                       | -0.1263       | FAM89A                     | 0.1002        |
| IL10                       | 0.1259        | NFKB1                      | 0.0965        |
| CCL2                       | 0.1258        | NFKBIA                     | 0.0964        |
| SOCS3                      | 0.1228        | CCR1                       | 0.0955        |
| OAS2                       | -0.1216       | NFKB2                      | 0.0950        |
| MX1                        | -0.1161       | TBX21                      | 0.0948        |
| TNFSF13B                   | -0.1127       | IL1B                       | 0.0947        |
| IFITM1                     | -0.1120       | CCL8                       | 0.0944        |
| IL1R2                      | 0.1073        | BST2                       | 0.0906        |

|                    |         |                |         |
|--------------------|---------|----------------|---------|
| DYRK2              | -0.1049 | IL2            | 0.0852  |
| RPL19              | -0.1011 | DYRK2          | -0.0834 |
| IL7R               | -0.0977 | CLEC7A/DECTIN1 | -0.0763 |
| CCL8               | 0.0973  | S100A9         | -0.0758 |
| TDRD9              | 0.0966  | DDX58/RIG1     | 0.0754  |
| ARL14EP            | -0.0954 | MERTK          | -0.0730 |
| SRC                | 0.0944  | IL1A           | 0.0729  |
| MERTK              | 0.0902  | IL7R           | -0.0721 |
| CD44               | 0.0891  | ZBTB16         | -0.0710 |
| IFIH1              | -0.0855 | IL10           | -0.0694 |
| TMEM173/STING      | 0.0847  | ZBP1           | 0.0674  |
| CCNB1IP1           | -0.0842 | RARRES3        | 0.0663  |
| OAS1               | -0.0828 | NFKBIZ         | 0.0663  |
| PTX3               | 0.0822  | PTX3           | -0.0658 |
| CLEC7A/DECTIN1     | -0.0775 | RELB           | 0.0643  |
| IRF3               | -0.0760 | IRF3           | -0.0620 |
| CCL4               | 0.0749  | ARL14EP        | 0.0617  |
| EIF2AK4            | -0.0740 | LILRB1         | 0.0609  |
| POU2F2             | 0.0737  | IL18R1         | -0.0604 |
| LILRB1             | 0.0719  | JAK2           | -0.0597 |
| POLR2A             | 0.0665  | CCL20          | 0.0579  |
| ZBTB16             | 0.0602  | TDRD9          | -0.0536 |
| ZAP70              | -0.0601 | IRF7           | 0.0490  |
| IDO1               | -0.0568 | POLR2A         | -0.0470 |
| CXCL9              | 0.0560  | IFITM1         | 0.0463  |
| RPLP0              | 0.0514  | IFNG           | 0.0461  |
| CD3D               | -0.0485 | CCL2           | 0.0427  |
| IL18R1             | 0.0460  | SOCS3          | 0.0424  |
| IFI44L             | -0.0430 | HAVCR2/TIM3    | -0.0405 |
| TBX21              | -0.0422 | CD3D           | 0.0400  |
| C3                 | 0.0361  | CX3CR1         | 0.0385  |
| IRF7               | -0.0338 | TGFB1          | 0.0379  |
| JAK2               | -0.0296 | IFI27          | 0.0353  |
| TGFB1              | 0.0285  | ZAP70          | 0.0351  |
| SLAMF7             | 0.0270  | STAT2          | 0.0323  |
| CCR1               | 0.0247  | IL1R2          | -0.0321 |
| FAM89A             | -0.0202 | CD209/DC-SIGN  | 0.0319  |
| ADGRE3             | 0.0177  | EIF2AK4        | 0.0214  |
| IFI27              | 0.0096  | IL6            | -0.0154 |
| TNFAIP3            | 0.0083  | RPL19          | -0.0153 |
| 121601901-HERV0116 | -0.0077 | CXCL2          | 0.0146  |
| IL18               | -0.0056 | CCNB1IP1       | 0.0120  |
| CXCL10/IP10        | -0.0047 | TNFSF10        | -0.0076 |
| MDC1               | 0.0043  | PTGS2          | -0.0072 |
| SOCS1              | -0.0036 | RPLP0          | -0.0068 |
| S100A9             | 0.0010  | IL18           | 0.0019  |

**Supplementary Table S5. Individual composition of the clusters obtained after LPS and SEB stimulation in the discovery cohort.**

| CLUSTERS | S1                                                     | S2                                                         | S3                                                               |
|----------|--------------------------------------------------------|------------------------------------------------------------|------------------------------------------------------------------|
| L1       | D15; D16; D17; D18;<br>D19; D20; D21; D22;<br>D23; D24 |                                                            |                                                                  |
| L2       | D4; D9; D10; D13                                       | D1; D11; D14; D26;<br>D29; D31; D32; D37;<br>D38 ;D40; D41 | D2; D3; D6; D12;<br>D25; D27; D28;<br>D30; D33; D34;<br>D35; D39 |
| L3       | D5; D8                                                 |                                                            |                                                                  |

Individual composition (donors) of the clusters obtained with LPS stimulation (on rows) and with SEB stimulation (on columns) and correspondence between both stimulations.

HV are depicted in blue, septic shock patients in black, non-survivors in red, and HAI in orange. D7 was excluded from the analysis as it did not pass quality control and there was not enough blood volume to stimulate D36 with SEB. D: Donor

**Supplementary Table S6. Clinical and immunological data for healthy donors and sepsis patients in the discovery and validation cohorts.**

|                                                                 | Discovery cohort (n=40) | Validation cohort (n=40) | P-value          |
|-----------------------------------------------------------------|-------------------------|--------------------------|------------------|
| <b>HEALTHY DONORS</b>                                           |                         |                          |                  |
| <b>Admission data</b>                                           |                         |                          |                  |
| Sex, male, n (%)                                                | 5 (50)                  | 5 (50)                   | 1                |
| median age, years [IQR]                                         | 54 [51.5-56.5]          | 73 [72-73.75]            | <b>&lt;0.001</b> |
| <b>Immunology</b>                                               |                         |                          |                  |
| median mHLA-DR, Ab/C [IQR]                                      | NA                      | 28344 [21238-31404]      | NA               |
| median TNF $\alpha$ secretion post-LPS stimulation, pg/mL [IQR] | 5214 [4203-5709]        | 4144 [3622-4956]         | 0.464            |
| <b>SEPTIC PATIENTS</b>                                          |                         |                          |                  |
| <b>Admission data</b>                                           |                         |                          |                  |
| Sex, male, n (%)                                                | 21 (70)                 | 21 (70)                  | 1                |
| median age, years [IQR]                                         | 66 [59-73]              | 66 [60-79]               | 0.487            |
| median BMI, kg/m <sup>2</sup> [IQR]                             | 27 [21-34]              | 25 [22-28]               | 0.290            |
| median SAPS II [IQR]                                            | 59 [47.5-76.5]          | 47 [39-56]               | <b>0.002</b>     |
| median SOFA score (day 1) [IQR]                                 | 8 [7-10]                | 9 [7-10]                 | 0.693            |
| Mechanical ventilation, n (%)                                   | 22 (73)                 | 20 (67)                  | 0.778            |
| median plasma Lactate level, mM [IQR]                           | 3.2 [2.6-5.2]           | 2.2 [1.7-2.6]            | <b>&lt;0.001</b> |
| Shock, n(%)                                                     | 30 (100)                | 20 (67)                  | <b>0.001</b>     |
| median CCI [IQR]                                                | 1.5 [0.1-3.3]           | 2 [0.8-4]                | 0.688            |
| Comorbidities <sup>a</sup> , n (%)                              |                         |                          | 0.778            |
| 0                                                               | 10 (33.3)               | 8 (26.7)                 |                  |
| $\geq 1$                                                        | 20 (66.7)               | 22 (73.3)                |                  |
| Primary site of infection, n (%)                                |                         |                          | <b>0.058</b>     |
| Abdominal                                                       | 9 (30)                  | 12 (40)                  |                  |
| UTI                                                             | 6 (20)                  | 2 (6.7)                  |                  |
| SST                                                             | 4 (13)                  | 2 (6.7)                  |                  |
| Pulmonary                                                       | 2(6.7)                  | 10 (33.3)                |                  |
| Others                                                          | 9 (30)                  | 4 (12.5)                 |                  |
| Type of primary infection, n (%)                                |                         |                          | 0.068            |
| Community acquired                                              | 13 (43)                 | 21 (70)                  |                  |
| Hospital acquired                                               | 17 (57)                 | 9 (30)                   |                  |
| Documentation of infection, n (%)                               |                         |                          | <b>&lt;0.001</b> |



|                                                                 |                   |                  |              |
|-----------------------------------------------------------------|-------------------|------------------|--------------|
| Gram-negative                                                   | 7 (23.3)          | 5 (16.7)         |              |
| Gram-positive                                                   | 6 (20)            | 10 (33.3)        |              |
| Virus                                                           | 1 (3.3)           | 0                |              |
| Fungal                                                          | 0                 | 4 (13.3)         |              |
| Co-infection                                                    | 6 (20)            | 5 (16.7)         |              |
| Non-documented infection                                        | 10 (33.3)         | 6 (20)           |              |
| Hydrocortisone, n (%)                                           | 10 (33)           | 7 (23.3)         | 0.566        |
| <b>Day 3-4 data</b>                                             |                   |                  |              |
| Immunology                                                      |                   |                  |              |
| median mHLA-DR, Ab/C [IQR]                                      | 7348 [3838-10103] | 4693 [3217-8363] | 0.187        |
| median TNF $\alpha$ secretion post-LPS stimulation, pg/mL [IQR] | 701 [320-1260]    | 1214 [709-1911]  | <b>0.021</b> |
| <b>Outcomes</b>                                                 |                   |                  |              |
| Vasopressor requirement, n(%)                                   | 30 (100)          | 28 (93)          | 0.491        |
| median vasopressor duration, days [IQR]                         | 3.5 [2-6.8]       | 1.9 [1-3.3]      | <b>0.001</b> |
| Hemofiltration, n (%)                                           | 10 (33)           | 7 (23)           | 0.566        |
| Hospital-acquired infection, n (%)                              | 1 (3.3)           | 8 (26.7)         | <b>0.025</b> |
| median ICU length of stay, days [IQR]                           | 8 [4.2-12]        | 8 [6-13]         | 0.378        |
| missing data                                                    | 0                 | 1                |              |
| median hospital length of stay, days [IQR]                      | 56 [20-78]        | 28 [13-48]       | <b>0.025</b> |
| missing data                                                    | 0                 | 3                |              |
| Mortality D28, n (%)                                            | 4 (13.3)          | 3 (10)           | 1            |

For numerical variables, t-test (parametric) or Wilcoxon (non-parametric) was used and for categorical variables, Chi-squared test was used.

SAPS II was calculated after admission and SOFA score was measured after 24 h of ICU stay.

BMI: body mass index

SAPS II: simplified acute physiology score

SOFA: sequential organ failure assessment

CCI: Charlson comorbidity index

UTI: urinary tract infection

SST: skin and soft tissue

HLA-DR: human leukocyte antigen DR

TNF $\alpha$ : tumour necrosis factor alpha

LPS: lipopolysaccharide

ICU: intensive care unit

<sup>a</sup>: Presence of comorbidities was affirmative when at least one of the following comorbidity was present in the patient: chronic pulmonary disease, heart failure, myocardial infarction, ulcer, diabetes, renal failure, or malign solid tumour.

**Supplementary Table S7. Presence and nature of patients' comorbidities in the validation cohort**

| Sample | Comorbidities | Cerebro-vascular damage | Pulmonary chronic | Heart failure | Myocardial infarction | Ulcer | Diabetes | Renal damage | Solid tumour malignancy |
|--------|---------------|-------------------------|-------------------|---------------|-----------------------|-------|----------|--------------|-------------------------|
| R3/4   | 2             | 0                       | 0                 | 1             | 0                     | 1     | 0        | 0            | 0                       |
| R5/6   | 1             | 0                       | 1                 | 0             | 0                     | 0     | 0        | 0            | 0                       |
| R7/8   | 1             | 0                       | 0                 | 0             | 0                     | 1     | 0        | 0            | 0                       |
| R9/10  | 0             | 0                       | 0                 | 0             | 0                     | 0     | 0        | 0            | 0                       |
| R11/12 | 3             | 1                       | 0                 | 1             | 0                     | 0     | 0        | 1            | 0                       |
| R13/14 | 3             | 0                       | 0                 | 0             | 1                     | 0     | 1        | 1            | 0                       |
| R15/16 | 3             | 0                       | 1                 | 0             | 0                     | 0     | 1        | 1            | 0                       |
| R17/18 | 2             | 0                       | 0                 | 1             | 0                     | 0     | 0        | 1            | 0                       |
| R19/20 | 2             | 0                       | 0                 | 0             | 0                     | 0     | 1        | 1            | 0                       |
| R21/22 | 2             | 0                       | 0                 | 0             | 1                     | 0     | 0        | 0            | 1                       |
| R23/24 | 0             | 0                       | 0                 | 0             | 0                     | 0     | 0        | 0            | 0                       |
| R25/26 | 1             | 0                       | 0                 | 0             | 0                     | 0     | 0        | 0            | 1                       |
| R27/28 | 2             | 0                       | 0                 | 1             | 1                     | 0     | 0        | 0            | 0                       |
| R29/30 | 2             | 0                       | 0                 | 0             | 1                     | 1     | 0        | 0            | 0                       |
| R31/32 | 1             | 0                       | 0                 | 0             | 0                     | 0     | 1        | 0            | 0                       |
| R33/34 | 0             | 0                       | 0                 | 0             | 0                     | 0     | 0        | 0            | 0                       |
| R35/36 | 5             | 0                       | 1                 | 1             | 0                     | 1     | 1        | 1            | 0                       |
| R37/38 | 3             | 1                       | 0                 | 0             | 1                     | 0     | 1        | 0            | 0                       |
| R39/40 | 0             | 0                       | 0                 | 0             | 0                     | 0     | 0        | 0            | 0                       |
| R41/42 | 0             | 0                       | 0                 | 0             | 0                     | 0     | 0        | 0            | 0                       |
| R43/44 | 1             | 0                       | 0                 | 0             | 0                     | 0     | 0        | 0            | 1                       |
| R45/46 | 0             | 0                       | 0                 | 0             | 0                     | 0     | 0        | 0            | 0                       |
| R47/48 | 3             | 1                       | 0                 | 1             | 0                     | 0     | 0        | 1            | 0                       |
| R49/50 | 0             | 0                       | 0                 | 0             | 0                     | 0     | 0        | 0            | 0                       |
| R51/52 | 2             | 0                       | 0                 | 0             | 0                     | 0     | 1        | 1            | 0                       |
| R57/58 | 0             | 0                       | 0                 | 0             | 0                     | 0     | 0        | 0            | 0                       |
| R59/60 | 2             | 0                       | 0                 | 0             | 0                     | 0     | 0        | 1            | 1                       |
| R61/62 | 1             | 0                       | 1                 | 0             | 0                     | 0     | 0        | 0            | 0                       |
| R63/64 | 1             | 0                       | 1                 | 0             | 0                     | 0     | 0        | 0            | 0                       |
| R85/86 | 1             | 0                       | 1                 | 0             | 0                     | 0     | 0        | 0            | 0                       |

**Supplementary Table S8. Infection number, type, and germs responsible for sepsis in the validation cohort**

| Sample | Infection number | Type                             | Germ                                                                                                    |
|--------|------------------|----------------------------------|---------------------------------------------------------------------------------------------------------|
| R3/4   | 2                | Fungal                           | <i>Candida krusei</i> and <i>Candida tropicalis</i>                                                     |
| R5/6   | 1                | Fungal                           | <i>Aspergillus fumigatus</i>                                                                            |
| R7/8   | 3                | Gram-negative and fungal         | <i>Enterobacter cloacae</i> , <i>Escherichia coli</i> and <i>Candida albicans</i>                       |
| R9/10  | 2                | Gram-positive and other bacteria | <i>Streptococcus spp</i> and <i>Actinomyces spp</i>                                                     |
| R11/12 | 2                | Gram-negative                    | <i>Providencia</i> and <i>Escherichia coli</i>                                                          |
| R13/14 | 1                | Gram-positive                    | <i>Staphylococcus aureus</i>                                                                            |
| R15/16 | 1                | Gram-positive                    | <i>Staphylococcus aureus</i>                                                                            |
| R17/18 | 1                | Gram-negative                    | <i>Klebsiella oxytoca</i>                                                                               |
| R19/20 | NA               |                                  | Non-documented infection                                                                                |
| R21/22 | 0                |                                  | Non-documented infection                                                                                |
| R23/24 | 1                | Gram-negative                    | <i>Klebsiella pneumoniae</i>                                                                            |
| R25/26 | 1                | Gram-negative                    | <i>Escherichia coli</i>                                                                                 |
| R27/28 | NA               |                                  | Non-documented infection                                                                                |
| R29/30 | 2                | Fungal                           | <i>Candida albicans</i> and <i>Candida glabrata</i>                                                     |
| R31/32 | 0                |                                  | Non-documented infection                                                                                |
| R33/34 | 2                | Gram-positive                    | <i>Streptococcus pyogenes (A)</i> and <i>Staphylococcus aureus</i>                                      |
| R35/36 | 1                | Gram-positive                    | <i>Coagulase-negative Staphylococcus spp</i>                                                            |
| R37/38 | 3                | Gram-negative and Gram-positive  | <i>Escherichia coli</i> , <i>Klebsiella pneumoniae</i> and <i>Coagulase-negative Staphylococcus spp</i> |
| R39/40 | 1                | Gram-positive                    | <i>Gram-positive Bacilli</i>                                                                            |
| R41/42 | 2                | Gram-positive and fungal         | <i>Candida albicans</i> and <i>Streptococcus spp</i>                                                    |
| R43/44 | 1                | Gram-negative                    | <i>Klebsiella pneumoniae</i>                                                                            |
| R45/46 | 1                | Fungal                           | <i>Candida albicans</i>                                                                                 |
| R47/48 | NA               |                                  | Non-documented infection                                                                                |
| R49/50 | 1                | Gram-positive                    | <i>Streptococcus pneumoniae</i>                                                                         |
| R51/52 | 1                | Gram-positive                    | <i>Enterococcus faecalis</i>                                                                            |
| R57/58 | 1                | Gram-positive                    | <i>Staphylococcus aureus</i>                                                                            |
| R59/60 | 0                |                                  | Non-documented infection                                                                                |
| R61/62 | 2                | Gram-positive                    | <i>Streptococcus spp</i> and <i>Staphylococcus epidermidis</i>                                          |
| R63/64 | 1                | Gram-positive                    | <i>Staphylococcus aureus</i>                                                                            |
| R85/86 | 2                | Gram-negative and Gram-positive  | <i>Streptococcus pneumoniae</i> and <i>Moraxella spp</i>                                                |

**Supplementary Table S9. Individual composition of the clusters obtained after SEB stimulation in the validation cohort.**

| Cluster SV1 (n=11)                                          | Cluster SV2 (n=14)                                                           | Cluster SV3 (n=17)                                                               |
|-------------------------------------------------------------|------------------------------------------------------------------------------|----------------------------------------------------------------------------------|
| R36; R65; R67; R69;<br>R71; R73; R75; R77;<br>R79; R81; R83 | R4; R14; R18; R24;<br>R28; R40; R42; R44;<br>R48; R50; R52; R58;<br>R62; R64 | R6; R8; R10; R12; R16;<br>R20; R22; R26; R30;<br>R32; R34; R38; R46;<br>R60; R86 |

HV are depicted in blue, septic patients in black, non-survivors in red, and HAI in orange. R: Donor

**Supplementary Table S10. NanoString target genes and accession numbers**

| Target genes   | Accession number | References                                      |
|----------------|------------------|-------------------------------------------------|
| ADGRE3         | NM_032571.2      | Davenport <i>et al. Lancet Respir Med.</i> 2016 |
| ARL14EP        | NM_152316.1      | Davenport <i>et al. Lancet Respir Med.</i> 2016 |
| BST2           | NM_004335.2      | Urrutia <i>et al. Cell Rep.</i> 2016            |
| C3             | NM_000064.2      | Urrutia <i>et al. Cell Rep.</i> 2016            |
| CCL2           | NM_002982.3      | Urrutia <i>et al. Cell Rep.</i> 2016            |
| CCL20          | NM_004591.1      | Urrutia <i>et al. Cell Rep.</i> 2016            |
| CCL4           | NM_002984.2      | Urrutia <i>et al. Cell Rep.</i> 2016            |
| CCL8           | NM_005623.2      | Urrutia <i>et al. Cell Rep.</i> 2016            |
| CCNB1IP1       | NM_182849.2      | Davenport <i>et al. Lancet Respir Med.</i> 2016 |
| CCR1           | NM_001295.2      | Urrutia <i>et al. Cell Rep.</i> 2016            |
| CD209/DC-SIGN  | NM_021155.2      | Pilling <i>et al. BMC Immunol.</i> 2017         |
| CD3D           | NM_000732.4      | Tawfik <i>et al. bioRxiv</i> 2019               |
| CD44           | NM_001001392.1   | Urrutia <i>et al. Cell Rep.</i> 2016            |
| CD74           | NM_001025159.1   | Cazalis <i>et al. Crit Care.</i> 2013           |
| CD83           | NM_004233.3      | Urrutia <i>et al. Cell Rep.</i> 2016            |
| CDKN1A         | NM_000389.2      | Urrutia <i>et al. Cell Rep.</i> 2016            |
| CLEC7A/DECTIN1 | NM_197954.2      | Mommert <i>et al. BMC Genomics.</i> 2018        |
| CX3CR1         | NM_001337.3      | Friggeri <i>et al. Crit Care.</i> 2016          |
| CXCL10/IP10    | NM_001565.1      | Urrutia <i>et al. Cell Rep.</i> 2016            |
| CXCL2/MIP2A    | NM_002089.3      | Urrutia <i>et al. Cell Rep.</i> 2016            |
| CXCL9          | NM_002416.1      | Urrutia <i>et al. Cell Rep.</i> 2016            |
| DECY1          | NM_001359.1      | Housekeeping gene                               |
| DDX58/RIG1     | NM_014314.3      | This study                                      |
| DYRK2          | NM_003583.3      | Davenport <i>et al. Lancet Respir Med.</i> 2016 |
| EIF2AK4        | NM_001013703.2   | Mommert <i>et al. BMC Genomics.</i> 2018        |
| FAM89A         | NM_198552.2      | Herberg <i>et al. JAMA.</i> 2016                |
| HAVCR2/TIM3    | NM_032782.3      | Gossez <i>et al. Sci Rep.</i> 2018              |
| HLA-DMB        | NM_002118.3      | Urrutia <i>et al. Cell Rep.</i> 2016            |
| HLA-DPA1       | NM_033554.2      | Urrutia <i>et al. Cell Rep.</i> 2016            |
| HLA-DPB1       | NM_002121.4      | Urrutia <i>et al. Cell Rep.</i> 2016            |
| HLA-DRA        | NM_019111.3      | Urrutia <i>et al. Cell Rep.</i> 2016            |
| HPRT1          | NM_000194.1      | Housekeeping gene                               |
| IDO1           | NM_002164.3      | Urrutia <i>et al. Cell Rep.</i> 2016            |
| IFI27          | NM_005532.3      | This study                                      |
| IFI35          | NM_005533.3      | Urrutia <i>et al. Cell Rep.</i> 2016            |
| IFI44L         | NM_006820.2      | Herberg <i>et al. JAMA.</i> 2016                |
| IFIH1          | NM_022168.2      | Urrutia <i>et al. Cell Rep.</i> 2016            |
| IFITM1         | NM_003641.3      | Urrutia <i>et al. Cell Rep.</i> 2016            |
| IFNG           | NM_000619.2      | Mommert <i>et al. BMC Genomics.</i> 2018        |
| IL10           | NM_000572.2      | Tawfik <i>et al. bioRxiv</i> 2019               |
| IL18           | NM_001562.2      | Tawfik <i>et al. bioRxiv</i> 2019               |

|               |                |                                                 |
|---------------|----------------|-------------------------------------------------|
| IL18R1        | NM_003855.2    | Mommert <i>et al. Crit Care.</i> 2020           |
| IL1A          | NM_000575.3    | Urrutia <i>et al. Cell Rep.</i> 2016            |
| IL1B          | NM_000576.2    | Urrutia <i>et al. Cell Rep.</i> 2016            |
| IL1R2         | NM_004633.3    | Mommert <i>et al. Crit Care.</i> 2020           |
| IL2           | NM_000586.2    | This study                                      |
| IL6           | NM_000600.1    | Urrutia <i>et al. Cell Rep.</i> 2016            |
| IL7R          | NM_002185.2    | Mouillaux <i>et al. Crit Care.</i> 2019         |
| IRAK2         | NM_001570.3    | Urrutia <i>et al. Cell Rep.</i> 2016            |
| IRF3          | NM_001571.5    | This study                                      |
| IRF7          | NM_001572.3    | Urrutia <i>et al. Cell Rep.</i> 2016            |
| JAK2          | NM_004972.2    | Urrutia <i>et al. Cell Rep.</i> 2016            |
| LILRB1        | NM_001081637.1 | Urrutia <i>et al. Cell Rep.</i> 2016            |
| MDC1          | NM_014641.2    | Davenport <i>et al. Lancet Respir Med.</i> 2016 |
| MERTK         | NM_006343.2    | Mommert <i>et al. BMC Genomics.</i> 2018        |
| MX1           | NM_002462.2    | Urrutia <i>et al. Cell Rep.</i> 2016            |
| NFKB1         | NM_003998.2    | Urrutia <i>et al. Cell Rep.</i> 2016            |
| NFKB2         | NM_002502.2    | Urrutia <i>et al. Cell Rep.</i> 2016            |
| NFKBIA        | NM_020529.1    | Urrutia <i>et al. Cell Rep.</i> 2016            |
| NFKBIZ        | NM_001005474.1 | Urrutia <i>et al. Cell Rep.</i> 2016            |
| OAS1          | NM_001032409.1 | Mommert <i>et al. BMC Genomics.</i> 2018        |
| OAS2          | NM_016817.2    | Mommert <i>et al. BMC Genomics.</i> 2018        |
| POLR2A        | NM_000937.2    | Housekeeping gene                               |
| POU2F2        | NM_002698.2    | Urrutia <i>et al. Cell Rep.</i> 2016            |
| PTGS2         | NM_000963.1    | Mommert <i>et al. BMC Genomics.</i> 2018        |
| PTX3          | NM_002852.3    | Albert Vega <i>et al. Front Immunol.</i> 2018   |
| RARRES3       | NM_004585.3    | Urrutia <i>et al. Cell Rep.</i> 2016            |
| RELB          | NM_006509.2    | Urrutia <i>et al. Cell Rep.</i> 2016            |
| RPL19         | NM_000981.3    | Housekeeping gene                               |
| RPLP0         | NM_001002.3    | Housekeeping gene                               |
| S100A9        | NM_002965.2    | Tawfik <i>et al. bioRxiv</i> 2019               |
| SLAMF7        | NM_021181.3    | Urrutia <i>et al. Cell Rep.</i> 2016            |
| SOCS1         | NM_003745.1    | Urrutia <i>et al. Cell Rep.</i> 2016            |
| SOCS3         | NM_003955.3    | Urrutia <i>et al. Cell Rep.</i> 2016            |
| SRC           | NM_005417.3    | Urrutia <i>et al. Cell Rep.</i> 2016            |
| STAT2         | NM_005419.2    | Urrutia <i>et al. Cell Rep.</i> 2016            |
| TBX21         | NM_013351.1    | This study                                      |
| TBP           | NM_001172085.1 | Housekeeping gene                               |
| TDRD9         | NM_153046.2    | Davenport <i>et al. Lancet Respir Med.</i> 2016 |
| TGFB1         | NM_000660.3    | Tawfik <i>et al. bioRxiv</i> 2019               |
| TMEM173/STING | NM_198282.1    | This study                                      |
| TNFA          | NM_000594.2    | Tawfik <i>et al. bioRxiv</i> 2019               |
| TNFAIP3       | NM_006290.2    | Urrutia <i>et al. Cell Rep.</i> 2016            |

|                    |                           |                                                 |
|--------------------|---------------------------|-------------------------------------------------|
| TNFSF10            | NM_003810.2               | Urrutia <i>et al. Cell Rep.</i> 2016            |
| TNFSF13B           | NM_006573.4               | Urrutia <i>et al. Cell Rep.</i> 2016            |
| ZAP70              | NM_001079.3               | Davenport <i>et al. Lancet Respir Med.</i> 2016 |
| ZBP1               | NM_001160419.2            | Davenport <i>et al. Lancet Respir Med.</i> 2016 |
| ZBTB16             | NM_006006.4               | Godini <i>et al. PLoS One.</i> 2018             |
| 121601901-HERV0116 | chr12:112972627-112975754 | Mommert <i>et al. BMC Genomics.</i> 2018        |
